# Supplementary material for: Lysine residues control the conformational dynamics of beta 2-glycoprotein I
Source: Royal Society of Chemistry journal article supplement (doi:10.1039/c8cp03234c), 2018-01-01
Supplement: c8cp03234c1.pdf [file c8cp03234c1.pdf]

## SUPPORTING INFORMATION

# Lysine residues control conformational dynamics of beta 2-glycoprotein I

Ina Buchholz,<sup>a,b</sup> Peter Nestler,<sup>a,b</sup> Susan Köppen<sup>c,d,e</sup> and Mihaela Delcea<sup>\*a,b</sup>

<sup>a</sup> Institute of Biochemistry, Ernst-Moritz-Arndt University Greifswald, 17489 Greifswald, Germany

<sup>b</sup> ZIK HIKE - Zentrum für Innovationskompetenz „Humorale Immunreaktionen bei kardiovaskulären Erkrankungen“, Ernst-Moritz-Arndt University Greifswald, 17489 Greifswald, Germany

<sup>c</sup> Hybrid Materials Interfaces Group, Faculty of Production Engineering, University of Bremen, 28359 Bremen, Germany

<sup>d</sup> Bremen Center for Computational Materials Science, 28359 Bremen, Germany

<sup>e</sup> MAPEX Center for Materials and Processes, University of Bremen, 28359 Bremen, Germany

Figure S1: SDS-PAGE and anti-acetylated lysine antibody Western blot of beta2GPI after acetylation with different molar ratios of NHS-Ac/lysine.

Figure S2: Quantitative shape analysis after AFM imaging of beta2GPI acetylated with different molar ratios of NHS-Ac/lysine.

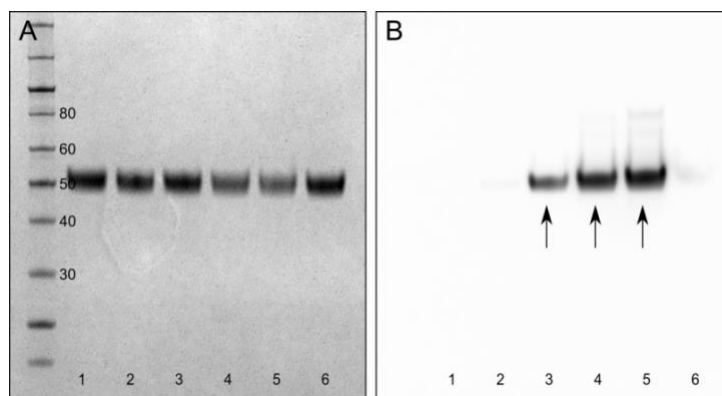

**Figure S1:** A) Reductive SDS-PAGE of beta2GPI after acetylation with different molar ratios of NHS-Ac to lysine residues. Lane 1 to 5 refer to dimethylformamide (DMF) treatment, as well as ratios of 1, 10, 100, and 1,000 NHS-Ac/lysine (mol/mol), respectively. Lane 6 describes the untreated beta2GPI. On the very left side a protein molecular weight standard is shown. B) Corresponding anti-acetylated lysine antibody Western blot of beta2GPI after acetylation at different NHS-Ac/lysine ratios. Lanes are the same as described in B. The bands corresponding to acetylated lysine residues of beta2GPI are highlighted by arrows.

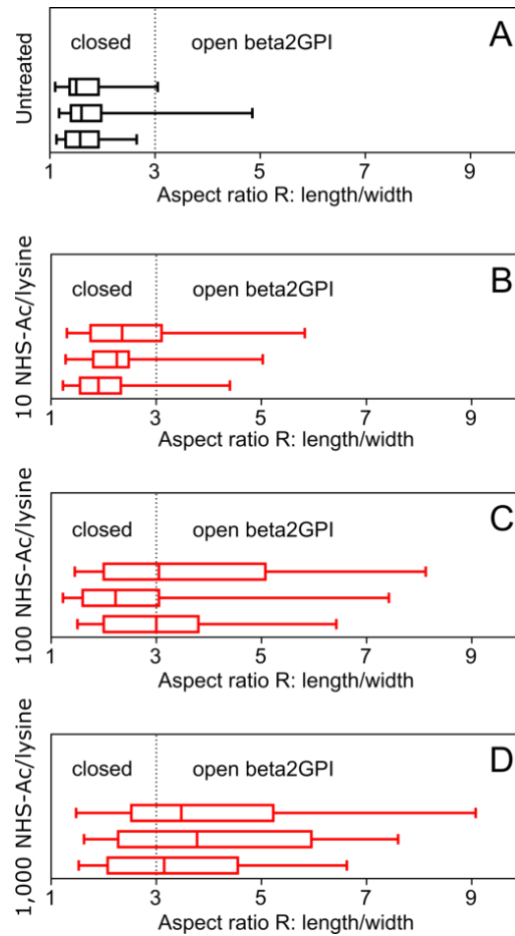

**Figure S2:** Quantitative shape analysis of flatly adsorbed beta2GPI after AFM imaging is shown as the aspect ratio  $R$  (particle length/width). Each box plot represents one independently prepared sample counting approximately 100 single beta2GPI molecules. (A) Untreated beta2GPI. (B-D) Beta2GPI after treatment with ratios of 10, 100 and 1,000 NHS-Ac/lysine (mol/mol), respectively. The threshold value to distinguish open from close beta2GPI amounts  $R = 3$ . Box plots show the median of  $R$ . Quantiles are set to 25 and 75 %, whereas whiskers cover quantiles of 5 to 95 % of the population.
